# Supplementary material for: Aberrant cervical innate immunity predicts onset of dysbiosis and sexually transmitted infections in women of reproductive age
Source: PLoS One. 2020 Jan 8;15(1):e0224359. doi: 10.1371/journal.pone.0224359 (PMC6948729; doi:10.1371/journal.pone.0224359)
Supplement: S1 Table — Baseline is defined either as (A) first of at least 2 consecutive quarterly visits tested for all cervicovaginal infections (CVIs) available for 769 women, or (B) the matched visit preceding the HIV seroconversion by two quarterly visits available for 703 women who were CVI positive at least once during the study. (XLSX) [file pone.0224359.s002.xlsx]

## Sheet: Final Table 1
TABLE S1. Participant characteristics defined at two different baseline points: (A) at the first of first two consecutive quarterly visits tested for cervicovaginal infection (CVI) during the study (available for 769 participants), and (B) at the matched visit preceding the HIV seroconversion by two quarterly visits (available for 703 participants who became CVI positive at least once during the …
Definition of Baseline Visit		(A) Baseline #1 =1st of two quarterly CVI-tested visits					(B) Baseline #2= matched to the time/visit preceeding HIV serconversion by two quarterly visits
CVI status		CVI-freea	Prevalent CVIb	Incident CVIsc		Total	Nugent 4-7	Nugent 7-11	C. albicans	C. trachomatis	N. gonorhoeae	T. vaginalis	HSV-2		Total
Women / Baseline n (%)		42 (6%)	585 (76%)	142 (18%)		769 (100%)	170 (24%)	198 (28%)	74 (10%)	15 (2%)	20 (3%)	21 (3%)	409 (58%)		703 (100%)
Demographic Parameters		n (row %)				n (column %)		n (row %)							n(column %)
Site
Uganda		28 (12)	166 (74)	31 (14)		225 (29)	32 (19)	41 (24)	9 (5)	5 (3)	7 (4)	5 (3)	90 (54)		168 (24)
Zimbabwe		14 (3)	419 (77)	111 (20)		544 (71)	138 (26)	157 (29)	65 (12)	10 (2)	13 (3)	16 (3)	319 (60)		535 (76)
P-value		<.001e	0.338e	0.031e		<0.001d	0.050e	0.150e	0.012e	0.369f	0.238e	1.000f	0.344e		<.001d
Age at screening
18-24		29 (7)	301 (71)	95 (22)		425 (55)	92 (24)	106 (27)	39 (10)	12 (3)	11 (3)	11 (3)	188 (48)		391 (56)
25+		13 (4)	284 (83)	47 (14)		344 (45)	78 (25)	92 (30)	35 (11)	3 (1)	9 (3)	10 (3)	221 (71)		312 (44)
P-value		0.065e	<.001e	0.002e		0.003d	0.656e	0.490e	0.594e	0.067f	0.955e	0.749e	<.001e		0.003d
HCg group
COC		14 (5)	196 (73)	59 (22)		269 (35)	64 (25)	67 (26)	26 (10)	8 (3)	6 (2)	6 (2)	145 (56)		259 (37)
DMPA		17 (6)	193 (73)	54 (20)		264 (34)	52 (21)	64 (26)	28 (11)	4 (2)	8 (3)	7 (3)	132 (54)		245 (35)
No-HC		11 (5)	195 (83)	29 (12)		235 (31)	53 (27)	67 (34)	20 (10)	3 (2)	6 (3)	8 (4)	131 (66)		198 (28)
P-value		0.671e	0.012e	0.013e		0.269d	0.371e	0.105e	0.855e	0.512f	0.802e	0.554e	0.016e		0.013d
Pregnancy/ Breastfeeding
Non-Pregnant & Non-Breastfeeding		29 (5)	471 (77)	114 (18)		614 (80)	134 (24)	161 (29)	58 (10)	11 (2)	16 (3)	15 (3)	331 (60)		552 (78)
Non-Pregnant & Breastfeeding		11 (9)	94 (76)	18 (15)		123 (16)	33 (28)	28 (24)	9 (8)	3 (2)	3 (2)	4 (3)	64 (54)		118 (17)
Pregnant		2 (6)	20 (63)	10 (31)		32 (4)	3 (9)	9 (27)	7 (21)	1 (3)	1 (3)	2 (6)	14 (42)		33 (5)
P-value		0.136f	0.185e	0.097e		<0.001d	0.044f	0.581e	0.080e	0.652f	1.000f	0.386f	0.074e		<.001d
# sexual partner
<2 sexual partners		42 (6)	569 (76)	140 (19)		751 (98)	166 (24)	191 (28)	74 (11)	14 (2)	16 (2)	18 (3)	395 (56)		686 (98)
2+ sexual partners		0 (0)	16 (89)	2 (11)		18 (2)	4 (24)	7 (41)	0 (0)	1 (6)	4 (24)	3 (18)	14 (82)		17 (2)
P-value		0.617f	0.269e	0.551f		<0.001d	1.000f	0.193e	0.241f	0.310f	0.001f	0.012f	0.046e		<.001d
# unprotected acts
15+		9 (5)	128 (77)	29 (18)		166 (22)	35 (22)	47 (29)	16 (10)	4 (2)	3 (2)	7 (4)	90 (56)		160 (23)
43326		13 (6)	148 (72)	46 (22)		207 (27)	44 (26)	41 (24)	18 (11)	2 (1)	4 (2)	4 (2)	93 (54)		171 (24)														2
42742		9 (5)	136 (78)	29 (17)		174 (23)	45 (25)	49 (27)	18 (10)	2 (1)	7 (4)	4 (2)	100 (56)		179 (25)
0 or no sex act		11 (5)	173 (78)	38 (17)		222 (29)	46 (24)	61 (32)	22 (11)	7 (4)	6 (3)	6 (3)	126 (65)		193 (27)
P-value		0.939e	0.346e	0.442e		0.011d	0.842e	0.427e	0.970e	0.321f	0.715f	0.681f	0.098e		0.349d
Vaginal drying:
Used water alone		0 (0)	1 (50)	1 (50)		2 (0)	1 (33)	1 (33)	0 (0)	0 (0)	0 (0)	0 (0)	1 (33)		3 (0)
Used cloth		2 (4)	34 (68)	14 (28)		50 (7)	14 (30)	9 (19)	7 (15)	0 (0)	0 (0)	1 (2)	29 (62)		47 (7)
other		1 (2)	52 (84)	9 (15)		62 (8)	20 (32)	21 (34)	6 (10)	2 (3)	1 (2)	1 (2)	38 (61)		62 (9)
No		39 (6)	498 (76)	118 (18)		655 (85)	135 (23)	167 (28)	61 (10)	13 (2)	19 (3)	19 (3)	341 (58)		591 (84)
P-value		0.465f	0.159f	0.133f		<0.001d	0.152f	0.287f	0.688f	0.574f	0.604f	0.907f	0.781f		<.001d
Vaginal cleaning:
Used water alone		14 (3)	298 (74)	93 (23)		405 (53)	94 (25)	115 (31)	40 (11)	12 (3)	11 (3)	6 (2)	224 (60)		376 (53)
Used water and soap		12 (9)	109 (80)	16 (12)		137 (18)	24 (24)	25 (25)	8 (8)	3 (3)	5 (5)	7 (7)	64 (63)		102 (15)
other		0 (0)	10 (91)	1 (9)		11 (1)	1 (11)	2 (22)	1 (11)	0 (0)	0 (0)	1 (11)	6 (67)		9 (1)
No		16 (7)	168 (78)	32 (15)		216 (28)	51 (24)	56 (26)	25 (12)	0 (0)	4 (2)	7 (3)	115 (53)		216 (31)
P-value		0.041f	0.313f	0.007f		0.149d	0.855f	0.473f	0.732f	0.025f	0.462f	0.015f	0.304f		0.072d
a, "CVI-free" , women who were CVI-free at all available visits; must have at least 2 non-missing consecutive quarterly CVI-tested visits; the first avaiable visit served as baseline.
b, "prevalent CVI" , women who were CVI positive on all available visits; must have at least 2 non-missing consecutive quartely CVI-tested visits; the first available visit served as baseline.
c, "incident CVI", women who had at least 2 non-missing CVI visits of which the first was negative and and the second positive for the tested CVI; if a woman had more than one CVI incidences, the first CVI-negative visit followed by a CVI-positive visit was chosen as a baseline
d, test for proportions by binomial/multinomial tests or exact test if cell<=5
e, Cochran-Mantel-Haenszel test is used, cell >5
f, Fisher exact test is used, cell <=5
g, HC=hormonal contraceptive; DMPA=depot medroxy-progesterone acetate; COC=combined oral HC; No-HC=no hormonal contraceptives
